# Supplementary material
Source: PubMed Central journal article supplement (PMC4227304)
Supplement: NIHMS392355-supplement-1_si_001.pdf [file NIHMS392355-supplement-1_si_001.pdf]

## SUPPORTING INFORMATION FILE

### STRUCTURAL BASIS FOR NUCLEOTIDE BINDING AND REACTION CATALYSIS IN MEVALONATE DIPHOSPHATE DECARBOXYLASE<sup>†</sup>

Michael L. Barta<sup>1,‡</sup>, William J. McWhorter<sup>1</sup>, Henry M. Mizioro<sup>2,\*</sup>, and Brian V. Geisbrecht<sup>1,\*</sup>

From Divisions of Cell Biology and Biophysics<sup>1</sup> and Molecular Biology and Biochemistry<sup>2</sup>,  
School of Biological Sciences, University of Missouri-Kansas City; Kansas City, Missouri 64110

Running Title: Crystal Structures of WT and mutant MDD ternary complexes

#### SUPPLEMENTAL FIGURE LEGENDS

SFigure 1.  $F_o-F_c$  map of ligands bound to MDD. (A)  $F_o-F_c$  map (*green mesh* at  $2.0\sigma$  contour) of the refined WT MDD-FMVAPP-ATP $\gamma$ S structure (gray) in the absence of modeled ligand. (B)  $F_o-F_c$  map (*green mesh* at  $2.0\sigma$  contour) of the refined S192A MDD-FMVAPP-ATP $\gamma$ S structure (cyan) in the absence of modeled ligand. (C)  $F_o-F_c$  map (*green mesh* at  $2.0\sigma$  contour) of the refined D283A MDD-FMVAPP-ATP $\gamma$ S structure (red) in the absence of modeled ligand. (D)  $F_o-F_c$  map (*green mesh* at  $3.0\sigma$  contour) of the refined WT MDD-MVAPP structure (gray) in the absence of modeled ligand. (E)  $F_o-F_c$  map (*green mesh* at  $3.0\sigma$  contour) of the refined S192A MDD-DPGP structure (cyan) in the absence of modeled ligand. (F)  $F_o-F_c$  map (*green mesh* at  $3.0\sigma$  contour) of the refined D283A MDD-DPGP structure (red) in the absence of modeled ligand.

SFigure 2.  $2F_o-F_c$  map of ligands bound to MDD. (A)  $2F_o-F_c$  map (*blue mesh* at  $1.0\sigma$  contour) of the refined WT MDD-FMVAPP-ATP $\gamma$ S structure (gray) with one molecule each of FMVAPP and ATP $\gamma$ S (yellow, ball and stick) modeled in a single active site. (B)  $2F_o-F_c$  map (*blue mesh* at  $1.0\sigma$  contour) of the

refined S192A MDD-FMVAPP-ATP $\gamma$ S structure (green) with one molecule each of FMVAPP and ATP $\gamma$ S (yellow, ball and stick) modeled per enzyme active site. (C)  $2F_o-F_c$  map (*blue mesh* at  $1.0\sigma$  contour) of the refined D283A MDD-FMVAPP-ATP $\gamma$ S structure (red) with one molecule each of MVAPP and ATP $\gamma$ S (yellow, ball and stick) modeled per enzyme active site. (D)  $2F_o-F_c$  map (*blue mesh* at  $1.0\sigma$  contour) of the refined WT MDD-MVAPP structure (gray) with one molecule of MVAPP (yellow, ball and stick) modeled per enzyme active site. (E)  $2F_o-F_c$  map (*blue mesh* at  $1.0\sigma$  contour) of the refined S192A MDD-DPGP structure (green) with one molecule of DPGP (yellow, ball and stick) modeled per enzyme active site. (F)  $2F_o-F_c$  map (*blue mesh* at  $1.0\sigma$  contour) of a representative model-to-map region of the refined S192A apo-MDD structure (green). (G)  $2F_o-F_c$  map (*blue mesh* at  $1.0\sigma$  contour) of the refined D283A MDD-DPGP structure (red) with one molecule of DPGP (yellow, ball and stick) modeled per enzyme active site.

SFigure 3. Co-crystal structures of mutant MDD bound to the substrate DPGP. (A)  $2.15 \text{ \AA}$  co-crystal structure of *S. epidermidis* S192A MDD in cartoon format (green). Substrate DPGP is represented as ball and stick (yellow). Active site side chains within interaction distance of DPGP are depicted in ball and stick (purple). (B)  $2.10 \text{ \AA}$  co-crystal structure of *S. epidermidis* D283A MDD in cartoon format (red). Substrate DPGP is represented as ball and stick (yellow). Active site side chains within interaction distance of DPGP are depicted in ball and stick (cyan). Hydrogen bonding distances can be found in Supplemental Table 5.

SFigure 4. Structural alignment of MDD crystal structures. (A) Alignment of WT MDD crystal structures by Local-Global Alignment (28); apo- (red), FMVAPP-bound (green), DPGP-bound (blue), MVAPP-bound (orange), FMVAPP/ATP $\gamma$ S-bound (gray) (28). (B) Alignment of S192A MDD crystal structures by Local-Global Alignment; apo- (red), FMVAPP-bound (green), DPGP-bound (blue), FMVAPP/ATP $\gamma$ S-bound (gray) (28). (C) Alignment of D283A MDD crystal structures by Local-Global Alignment; DPGP-bound (blue), MVAPP/ATP $\gamma$ S-bound (gray) (28). Alignment statistics can be found in Supplemental Table 1.

# Supplemental Figure 1

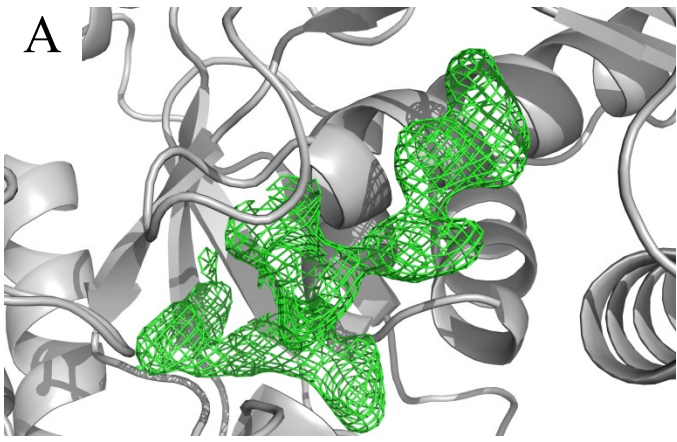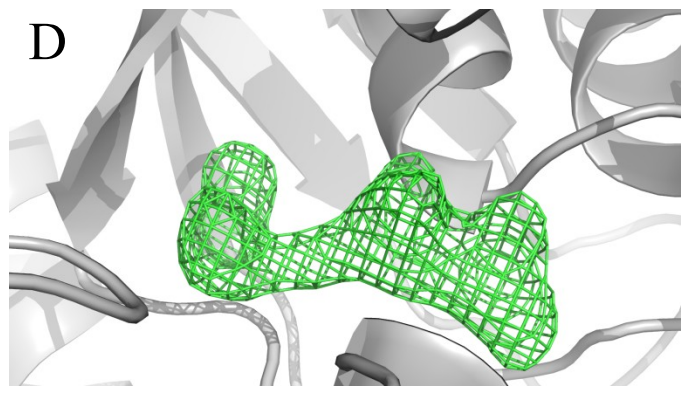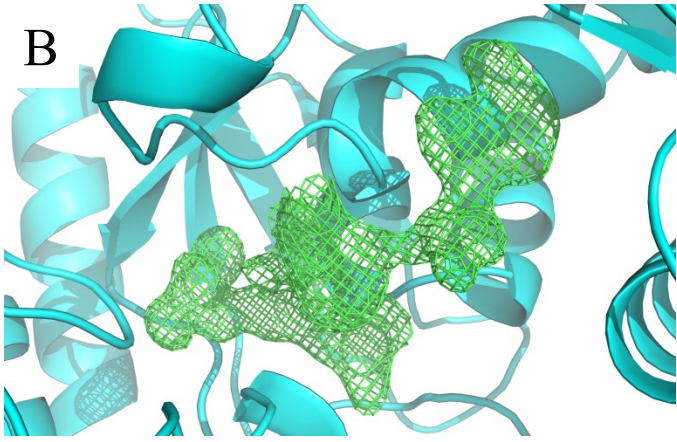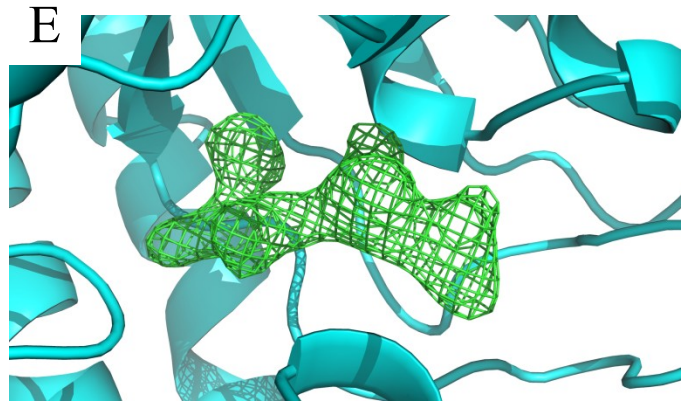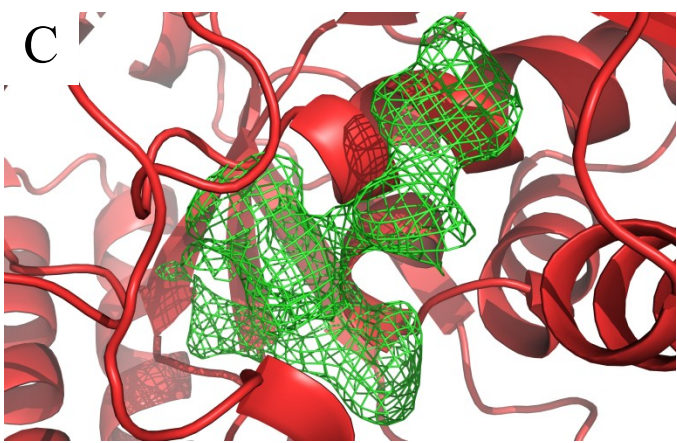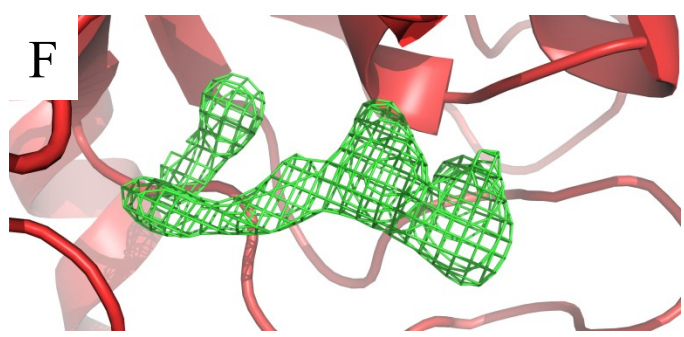

# Supplemental Figure 2

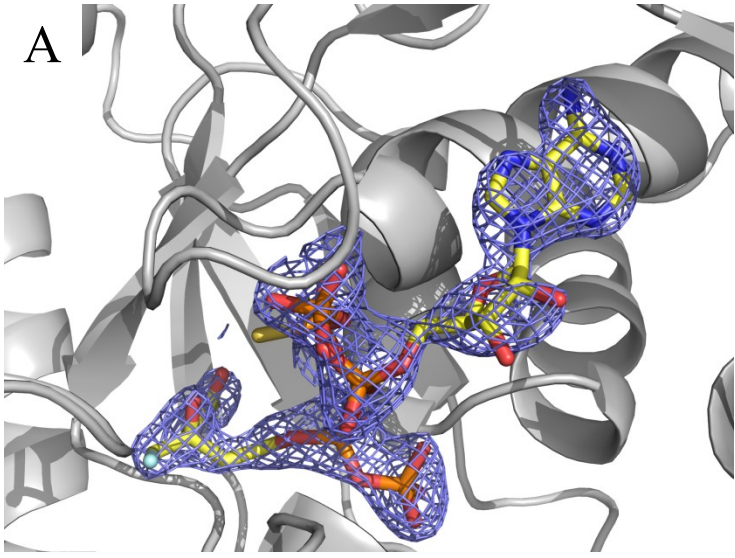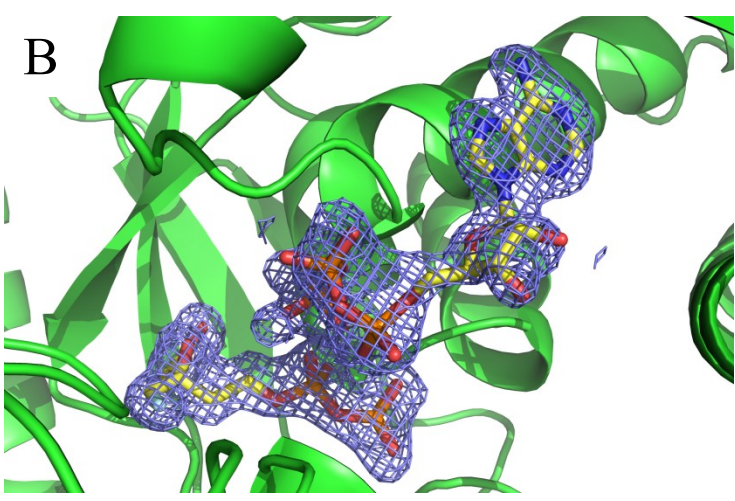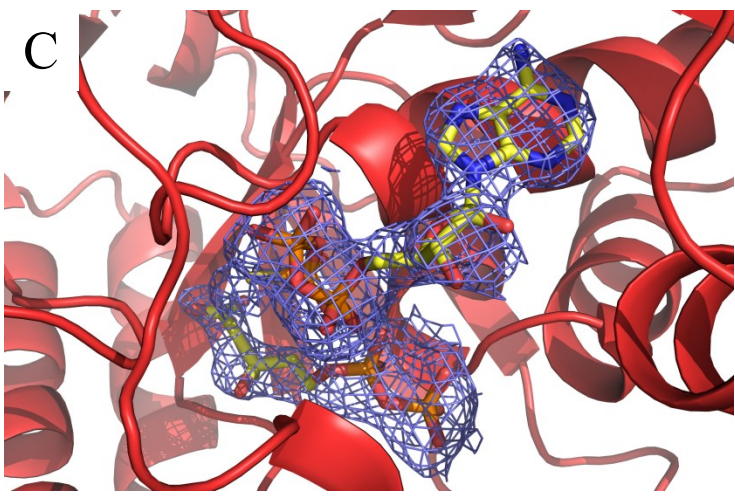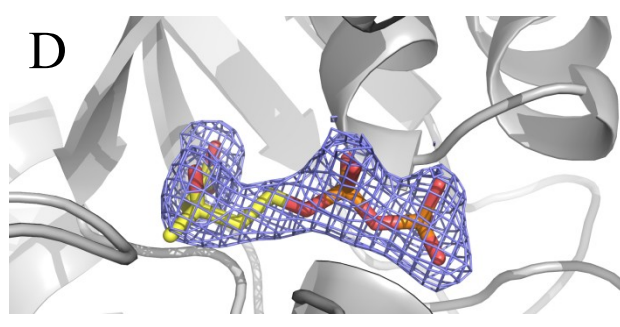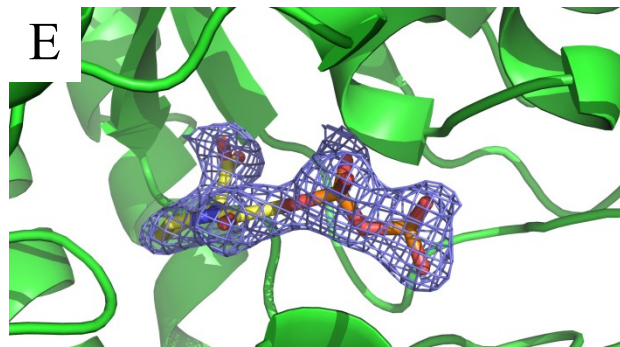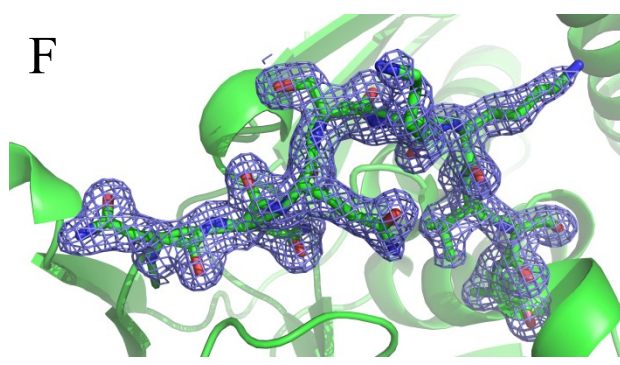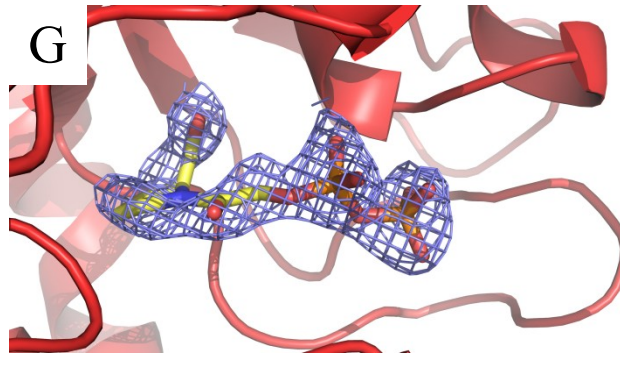

Supplemental Figure 3

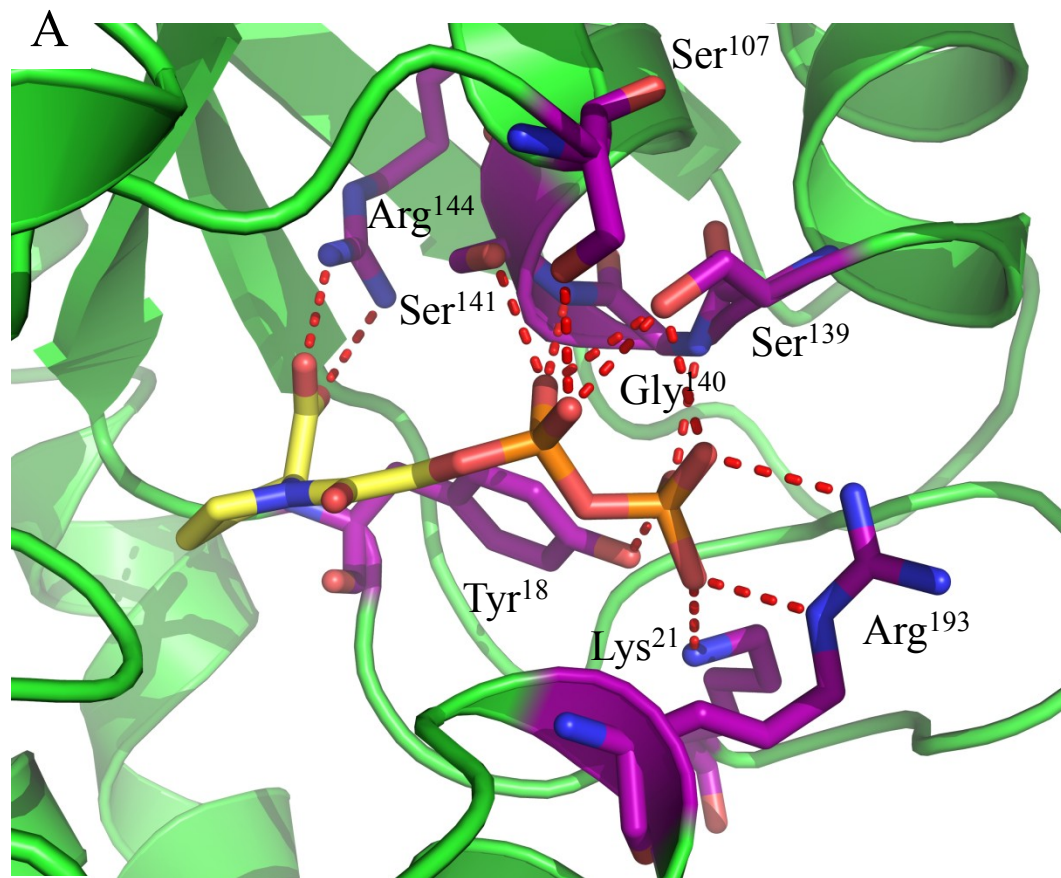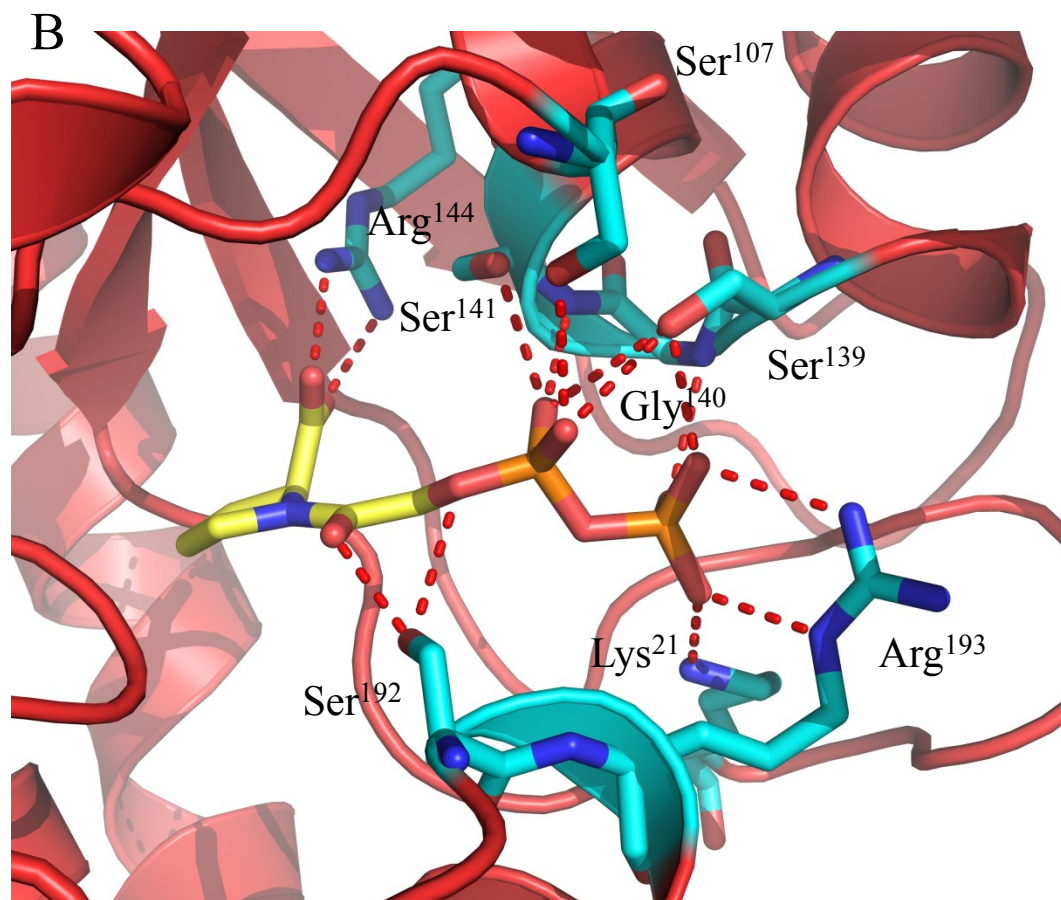

# Supplemental Figure 4

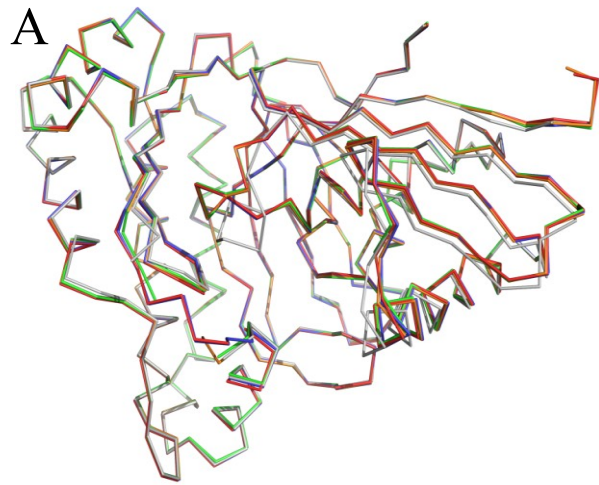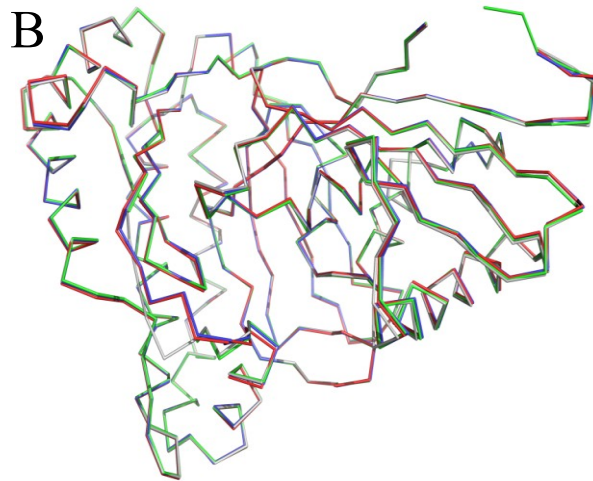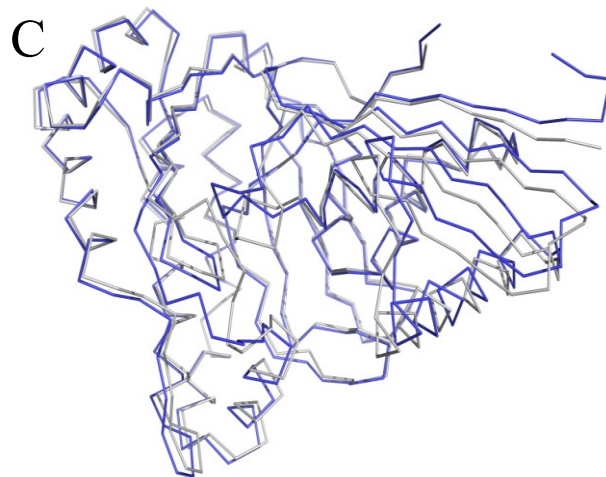

# Supplemental Table 1

## Supplemental Refinement Data

|                  | S192A MDD | S192A MDD | S192A MDD | MDD    | D283A MDD | MDD    | D283A MDD |
|------------------|-----------|-----------|-----------|--------|-----------|--------|-----------|
| Protein          | Native    | Native    | Native    | Native | Native    | Native | Native    |
| Ligands          |           | DPGP      | FMVAPP    | FMVAPP | MVAPP     | MVAPP  | DPGP      |
|                  |           |           | AGS       | AGS    | AGS       |        |           |
| Ligand Occupancy |           |           |           |        |           |        |           |
| DPGP             |           |           |           |        |           |        |           |
| Chain 1          |           | 95.0      |           |        |           |        | 74.0      |
| Chain 2          |           | 100.0     |           |        |           |        | 74.0      |
| FMVAPP           |           |           |           |        |           |        |           |
| Chain 1          |           |           | 93.0      | 78.0   |           |        |           |
| Chain 2          |           |           | 100.0     |        |           |        |           |
| MVAPP            |           |           |           |        |           |        |           |
| Chain 1          |           |           |           |        | 96.0      | 94.0   |           |
| Chain 2          |           |           |           |        | 100.0     | 91.0   |           |
| Chain 3          |           |           |           |        | 92.0      |        |           |
| Chain 4          |           |           |           |        | 91.0      |        |           |
| Chain 5          |           |           |           |        | 88.0      |        |           |
| Chain 6          |           |           |           |        | 92.0      |        |           |
| Chain 7          |           |           |           |        | 96.0      |        |           |
| Chain 8          |           |           |           |        | 90.0      |        |           |
| ATPyS            |           |           |           |        |           |        |           |
| Chain 1          |           |           | 72.0      | 79.0   | 95.0      |        |           |
| Chain 2          |           |           | 81.0      |        | 96.0      |        |           |
| Chain 3          |           |           |           |        | 91.0      |        |           |
| Chain 4          |           |           |           |        | 97.0      |        |           |
| Chain 5          |           |           |           |        | 98.0      |        |           |
| Chain 6          |           |           |           |        | 99.0      |        |           |
| Chain 7          |           |           |           |        | 96.0      |        |           |
| Chain 8          |           |           |           |        | 95.0      |        |           |

# Supplemental Table 2

WT MDD + ATPgS

Contacts

| Enzyme     |      | Distance (Å) |      | Inhibitor       |  |
|------------|------|--------------|------|-----------------|--|
| Amino Acid | Atom | ATPgS        | Atom | Group           |  |
| Glu69      | OE1  | 2.75         | O2'  | Ribose hydroxyl |  |
| Ser94      | OG   | 2.64         | N6   | Purine ring     |  |
| Asn96      | ND2  | 2.98         | N7   | Purine ring     |  |
| Asn96      | OD1  | 3.40         | N6   | Purine ring     |  |
| Ala105     | N    | 2.92         | O2B  | β-phosphoryl    |  |
| Ser106     | N    | 2.86         | O1B  | α-phosphoryl    |  |
| Ser106     | OG   | 2.61         | O1B  | α-phosphoryl    |  |
| Ser107     | N    | 3.33         | O1B  | α-phosphoryl    |  |
| Ser107     | N    | 3.22         | O2G  | β-phosphoryl    |  |
| Ser107     | N    | 3.20         | O3B  | γ-phosphoryl    |  |
| Ser107     | OG   | 2.83         | O2G  | β-phosphoryl    |  |
| Ser107     | OG   | 2.74         | O3B  | γ-phosphoryl    |  |
| Ala108     | N    | 3.01         | O2G  | β-phosphoryl    |  |
| Ser141     | OG   | 3.13         | O3G  | γ-phosphoryl    |  |
| Ser192     | N    | 3.24         | O1A  | α-phosphoryl    |  |
| Ser192     | OG   | 3.00         | O1A  | α-phosphoryl    |  |

S192A MDD + ATPgS

Contacts

| Enzyme     |      | Distance (Å) |      | Inhibitor           |  |
|------------|------|--------------|------|---------------------|--|
| Amino Acid | Atom | ATPgS        | Atom | Group               |  |
| Glu69      | OE2  | 3.01         | O3'  | Ribose hydroxyl     |  |
| Glu69      | OE2  | 3.32         | O2'  | Ribose hydroxyl     |  |
| Ser94      | OG   | 2.55         | N6   | Purine ring         |  |
| Asn96      | ND2  | 3.02         | N7   | Purine ring         |  |
| Asn96      | OD1  | 3.22         | N6   | Purine ring         |  |
| Ser106     | N    | 3.08         | O1B  | α-phosphoryl        |  |
| Ser106     | OG   | 3.33         | O1B  | α-phosphoryl        |  |
| Ser107     | N    | 2.96         | O3B  | γ-phosphoryl        |  |
| Ser107     | OG   | 2.58         | S1G  | γ-phosphoryl Sulfur |  |
| Ser107     | OG   | 2.92         | O3B  | γ-phosphoryl        |  |
| Ala108     | N    | 3.01         | O2G  | β-phosphoryl        |  |
| Ser141     | OG   | 3.21         | S1G  | γ-phosphoryl Sulfur |  |

D283A MDD + ATPgS

Contacts

| Enzyme     |      | Distance (Å) |      | Inhibitor       |  |
|------------|------|--------------|------|-----------------|--|
| Amino Acid | Atom | ATPgS        | Atom | Group           |  |
| Glu69      | OE1  | 2.68         | O2'  | Ribose hydroxyl |  |
| Glu69      | OE2  | 3.04         | O3'  | Ribose hydroxyl |  |
| Ser94      | OG   | 2.61         | N6   | Purine ring     |  |
| Asn96      | ND2  | 2.70         | N7   | Purine ring     |  |
| Asn96      | OD1  | 3.18         | N6   | Purine ring     |  |
| Ala101     | N    | 3.17         | O1B  | α-phosphoryl    |  |
| Gly103     | N    | 2.85         | O2B  | β-phosphoryl    |  |
| Leu104     | N    | 3.09         | O2B  | β-phosphoryl    |  |
| Ala105     | N    | 3.05         | O2B  | β-phosphoryl    |  |
| Ser106     | OG   | 2.67         | O1B  | α-phosphoryl    |  |
| Ser107     | N    | 3.35         | O3B  | γ-phosphoryl    |  |
| Ser107     | OG   | 2.60         | O2G  | β-phosphoryl    |  |
| Ser107     | OG   | 2.75         | O3B  | γ-phosphoryl    |  |
| Ser107     | OG   | 2.87         | O3G  | γ-phosphoryl    |  |
| Ser141     | OG   | 3.05         | O2G  | β-phosphoryl    |  |
| Lys188     | NZ   | 3.15         | O3A  | γ-phosphoryl    |  |
| Ser192     | N    | 3.37         | O1A  | α-phosphoryl    |  |
| Ser192     | OG   | 3.39         | O2A  | β-phosphoryl    |  |
| Ser192     | OG   | 3.37         | O3G  | γ-phosphoryl    |  |
| Ser192     | OG   | 3.25         | O3A  | γ-phosphoryl    |  |



# Supplemental Table 3

|                  |                  | WT MDD    |           |                     |          |                             |               |              |  |
|------------------|------------------|-----------|-----------|---------------------|----------|-----------------------------|---------------|--------------|--|
| <b>Protein 1</b> | <b>Protein 2</b> | <b>N1</b> | <b>N2</b> | <b>Distance (Å)</b> | <b>N</b> | <b>RMSD (Å<sup>2</sup>)</b> | <b>Seq Id</b> | <b>LGA S</b> |  |
| apo-MDD          | FMVAPP           | 324       | 327       | 5.0                 | 323      | 0.43                        | 99.69         | 98.54        |  |
| apo-MDD          | DPGP             | 329       | 327       | 5.0                 | 326      | 0.17                        | 100.00        | 99.69        |  |
| apo-MDD          | MVAPP            | 325       | 327       | 5.0                 | 324      | 0.58                        | 99.38         | 98.73        |  |
| apo-MDD          | ternary complex  | 322       | 327       | 5.0                 | 319      | 0.73                        | 99.37         | 96.81        |  |
| FMVAPP           | DPGP             | 329       | 324       | 5.0                 | 324      | 0.25                        | 100.00        | 99.93        |  |
| FMVAPP           | MVAPP            | 325       | 324       | 5.0                 | 322      | 0.40                        | 99.38         | 99.17        |  |
| FMVAPP           | ternary complex  | 322       | 324       | 5.0                 | 321      | 0.78                        | 100.00        | 98.21        |  |
| DPGP             | MVAPP            | 325       | 329       | 5.0                 | 324      | 0.33                        | 100.00        | 98.32        |  |
| DPGP             | ternary complex  | 322       | 329       | 5.0                 | 320      | 0.63                        | 99.69         | 96.61        |  |
| MVAPP            | ternary complex  | 322       | 325       | 5.0                 | 319      | 0.68                        | 100.00        | 97.57        |  |

|                  |                  | S192A MDD |           |                     |          |                             |               |              |  |
|------------------|------------------|-----------|-----------|---------------------|----------|-----------------------------|---------------|--------------|--|
| <b>Protein 1</b> | <b>Protein 2</b> | <b>N1</b> | <b>N2</b> | <b>Distance (Å)</b> | <b>N</b> | <b>RMSD (Å<sup>2</sup>)</b> | <b>Seq Id</b> | <b>LGA S</b> |  |
| apo-MDD          | FMVAPP           | 328       | 330       | 5.0                 | 326      | 0.38                        | 100.00        | 98.61        |  |
| apo-MDD          | DPGP             | 331       | 330       | 5.0                 | 330      | 0.17                        | 100.00        | 100.00       |  |
| apo-MDD          | ternary complex  | 330       | 330       | 5.0                 | 330      | 0.49                        | 100.00        | 99.67        |  |
| FMVAPP           | DPGP             | 331       | 328       | 5.0                 | 326      | 0.32                        | 100.00        | 99.25        |  |
| FMVAPP           | ternary complex  | 330       | 328       | 5.0                 | 326      | 0.20                        | 100.00        | 99.39        |  |
| DPGP             | ternary complex  | 330       | 331       | 5.0                 | 330      | 0.47                        | 100.00        | 99.40        |  |

|                  |                  | D283A MDD |           |                     |          |                             |               |              |  |
|------------------|------------------|-----------|-----------|---------------------|----------|-----------------------------|---------------|--------------|--|
| <b>Protein 1</b> | <b>Protein 2</b> | <b>N1</b> | <b>N2</b> | <b>Distance (Å)</b> | <b>N</b> | <b>RMSD (Å<sup>2</sup>)</b> | <b>Seq Id</b> | <b>LGA S</b> |  |
| DPGP             | ternary complex  | 326       | 331       | 5.0                 | 322      | 1.10                        | 99.69         | 94.55        |  |

# Supplemental Table 4

D283A MDD + MVAPP  
Contacts

| Enzyme     |      | Distance (Å) | Inhibitor |                      |
|------------|------|--------------|-----------|----------------------|
| Amino Acid | Atom | MVAPP        | Atom      | Group                |
| Ala14      | N    | 3.06         | OAD       | Carboxylate          |
| Lys17      | NZ   | 3.07         | OAA       | Carboxylate          |
| Tyr18      | O    | 3.23         | OAE       | C3-hydroxyl          |
| Tyr18      | OH   | 2.88         | OAF       | $\beta$ -phosphoryl  |
| Lys21      | NZ   | 2.70         | OAB       | $\beta$ -phosphoryl  |
| Ser107     | OG   | 2.99         | OAH       | $\alpha$ -phosphoryl |
| Ser139     | OG   | 2.87         | OAG       | $\beta$ -phosphoryl  |
| Ser139     | OG   | 2.73         | OAH       | $\alpha$ -phosphoryl |
| Gly140     | N    | 2.66         | OAF       | $\beta$ -phosphoryl  |
| Ser141     | N    | 2.99         | OAC       | $\alpha$ -phosphoryl |
| Ser141     | OG   | 3.5          | OAH       | $\alpha$ -phosphoryl |
| Arg193     | NE   | 2.59         | OAB       | $\beta$ -phosphoryl  |
| Arg193     | NH2  | 3.03         | OAB       | $\beta$ -phosphoryl  |
| Arg193     | NH2  | 2.70         | OAG       | $\beta$ -phosphoryl  |

WT MDD + MVAPP  
Contacts

| Enzyme     |      | Distance (Å) | Inhibitor |                      |
|------------|------|--------------|-----------|----------------------|
| Amino Acid | Atom | MVAPP        | Atom      | Group                |
| Tyr18      | N    | 2.76         | OAA       | Carboxylate          |
| Tyr18      | OH   | 2.80         | OAF       | $\beta$ -phosphoryl  |
| Lys21      | NZ   | 2.78         | OAB       | $\beta$ -phosphoryl  |
| Ser107     | OG   | 3.39         | OAH       | $\alpha$ -phosphoryl |
| Ser139     | OG   | 3.39         | OAC       | $\beta$ -phosphoryl  |
| Ser139     | OG   | 2.54         | OAG       | $\alpha$ -phosphoryl |
| Gly140     | N    | 2.80         | OAF       | $\beta$ -phosphoryl  |
| Ser141     | N    | 3.01         | OAC       | $\alpha$ -phosphoryl |
| Ser141     | OG   | 2.72         | OAC       | $\alpha$ -phosphoryl |
| Arg144     | NH1  | 3.26         | OAA       | Carboxylate          |
| Arg144     | NH2  | 2.87         | OAD       | Carboxylate          |
| Ser192     | OG   | 2.95         | OAH       | $\alpha$ -phosphoryl |
| Arg193     | NE   | 2.78         | OAB       | $\beta$ -phosphoryl  |
| Arg193     | NH2  | 3.09         | OAG       | $\beta$ -phosphoryl  |
| Asp283     | OD1  | 3.35         | OAE       | C3-hydroxyl          |

# Supplemental Table 5

D283A MDD + DPGP  
Contacts

| Enzyme     |      | Distance (Å) | Inhibitor |              |
|------------|------|--------------|-----------|--------------|
| Amino Acid | Atom | MVAPP        | Atom      | Group        |
| Lys21      | NZ   | 2.73         | OAF       | β-phosphoryl |
| Lys21      | NZ   | 3.41         | OAG       | β-phosphoryl |
| Ser107     | OG   | 3.21         | OAD       | α-phosphoryl |
| Ser139     | OG   | 2.73         | OAC       | β-phosphoryl |
| Ser139     | OG   | 2.93         | OAD       | α-phosphoryl |
| Ser139     | OG   | 3.32         | OAH       | α-phosphoryl |
| Gly140     | N    | 3.07         | OAG       | β-phosphoryl |
| Ser141     | N    | 3.01         | OAH       | α-phosphoryl |
| Ser141     | OG   | 2.98         | OAH       | α-phosphoryl |
| Arg144     | NH1  | 2.85         | O         | Carboxylate  |
| Arg144     | NH2  | 2.95         | O         | Carboxylate  |
| Arg144     | NH2  | 3.14         | OXT       | Carboxylate  |
| Ser192     | OG   | 3.25         | OAM       | α-phosphoryl |
| Ser192     | OG   | 2.58         | OAB       | C2-hydroxyl  |
| Arg193     | NE   | 2.78         | OAF       | β-phosphoryl |
| Arg193     | NH2  | 3.12         | OAC       | β-phosphoryl |

S192A MDD + DPGP Contacts

| Enzyme     |      | Distance (Å) | Inhibitor |              |
|------------|------|--------------|-----------|--------------|
| Amino Acid | Atom | MVAPP        | Atom      | Group        |
| Tyr18      | OH   | 2.68         | OAG       | β-phosphoryl |
| Lys21      | NZ   | 2.61         | OAF       | β-phosphoryl |
| Ser107     | OG   | 2.84         | OAD       | α-phosphoryl |
| Ser139     | OG   | 2.84         | OAD       | α-phosphoryl |
| Ser139     | OG   | 2.95         | OAC       | β-phosphoryl |
| Ser139     | OG   | 3.12         | OAH       | α-phosphoryl |
| Gly140     | N    | 2.91         | OAG       | β-phosphoryl |
| Ser141     | N    | 2.97         | OAH       | α-phosphoryl |
| Ser141     | OG   | 2.75         | OAH       | α-phosphoryl |
| Arg144     | NH1  | 3.12         | O         | Carboxylate  |
| Arg144     | NH2  | 2.96         | O         | Carboxylate  |
| Arg144     | NH2  | 3.13         | OXT       | Carboxylate  |
| Arg193     | NE   | 2.82         | OAF       | β-phosphoryl |
| Arg193     | NH2  | 2.94         | OAC       | β-phosphoryl |
